# Supplementary material for: Variability of Lidar-Derived Particle Properties Over West Africa Due to Changes in Absorption: Towards an Understanding
Source: Copernicus journal article supplement (doi:10.5194/acp-2020-98), 2020-02-19
Supplement: Supplementary file [file acp-2020-98-AC1-supplement.pdf]

## Response to reviewer 2

First of all, we would like to thank the reviewer for very detailed review and numerous useful comments. We tried to include these in revised manuscript.

Below are our responses:

*However, conclusions are drawn (from observations and simulations) which are not at all trustworthy (to this reviewer) as long as a spheroidal shape model for the unknown irregular shape of mineral dust particles must be assumed in the modelling approaches and the influence of this assumption on the final results remains unknown, at least is not discussed and quantified.*

### **Discussions**

*Another critical point is that a reader may get the impression that the findings hold for mineral dust in general, and not only and specifically for western Saharan dust and dust/smoke mixtures. However, the literature contains numerous papers that are in contradiction with the findings presented here and in Veselovskii et al. (2016). For example, such large values of up to 1.5 for the ratio of the 355 to 532nm lidar ratios as reported here together with particle depolarization ratio of larger than 30 % and thus indicating pure dust conditions has never been reported in numerous others papers in the literature.*

Reviewer is right, there are numerous publications where researches reported, that lidar ratios at 355 and 532 nm coincide. We should mention, that recent measurements of Saharan dust at Crete also show  $LR_{355} > LR_{532}$ . Actually, the goal of this manuscript is to show that lidar ratios (LR) may coincide ( $LR_{355} = LR_{532}$ ) or  $LR_{355} > LR_{532}$  nm depending on dust origin. We added corresponding comment in Conclusion.

*Larger backscatter in the green than in the blue is reported sometimes but only as an exception.*

Yes, I don't think that these observations are done for pure dust.

*Furthermore, all these inversion procedures(lidar, photometer) assume particles with radius < 15  $\mu$ m, but the lidar field site (Senegal) is almost in a desert source region so that the probability of the occurrence of giant particles is never zero. This can be another 'efficient' error source.*

In the measurements of the lidar ratio we don't make assumption about particle shape or size. But in AERONET, the giant particles may be provide some effect. Unfortunately, at a moment we are not able to quantify it.

### **Detailed comments and suggestions:**

*P2 L65-67: One should even include the third part of the entire SAMUM-SALTRACE series and the related papers of Gross et al 2015, Rittmeister et al., 2017, and Haarig et al. 2017.*

Added

*P2 L69-77: I am confused that the backscatter coefficient (a pure scattering parameter) is very sensitive to the imaginary part of the refractive index (describing the absorption efficiency), but the extinction coefficient (absorption plus scattering coefficient) is insensitive to the imaginary part (to say it again describing the absorption features of aerosol particles). Can you please provide more background information on this 'apparent contradiction' that a scattering process is influenced by the imaginary part, but absorption features not?*

Yes, this is property of backscattering, and it does not depend on particle shape. This is true both for spheres and spheroids. Corresponding computations can be seen, for example in Fig.6. of (Veselovskii et al., 2010).

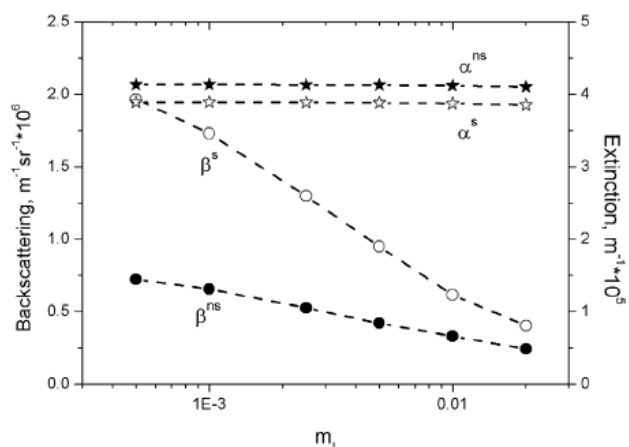

**Figure 6.** The particle backscattering (circles) and extinction (stars) coefficients at 355 nm wavelength as a function of the imaginary part of the refractive index. Calculations for spheres (open symbols) and spheroids (solid symbols) were performed for the PSD<sub>20</sub> with  $m_R = 1.55$ ,  $N_f = 100 \text{ cm}^{-3}$ .

The extinction is less sensitive, because it is the sum of scattering and absorption: with increase of the imaginary part the absorption rises, but scattering decreases. Reference is added to manuscript.

*P2 L126: The paper emphasis the usefulness of the lidar ratio (S) wavelength dependence. Why not writing down the relationship between all the different Angstrom exponents,  $AE(ext)$ ,  $AE(bsc)$ ,  $AE(S)$ , that is  $AE(S) = AE(ext) - AE(bsc)$  as introduced by Ansmann et al., JGR, 107, 10.1029/2001JD001109, 2002. In this way, it is much more easy to follow the discussion later on, when  $AE(ext)$  is frequently around zero, because then we have simply:  $AE(S) = -AE(bsc)$ .*

Yes, it is possible to introduce Angstrom exponent for lidar ratios also. Still we prefer to show ratio  $S_{355}/S_{532}$ , think it is more convenient.

*P4 L120 – P5 L138, A lot of equations: Are all these quantities used later on?*

Yes, when we analyze contribution of smoke, all these equations are used.

*P7 L206 – 209: Here again the confusing relationship between backscatter coefficient and imaginary part : I am still confused by the high negative  $AE(bsc)$  values. Unfortunately, extinction profiles (with rather reasonable wavelength dependence) are frequently shown, but the profiles of the backscatter coefficients for these high negative  $AE$  values are never shown. Such observations are rare in the literature and may be related to the region of western Africa and proximity to dust source regions (and the omnipresence of coarse and giant dust particles).*

We didn't show profiles of backscattering coefficients because extinctions and lidar ratios are presented. But in the revised manuscript we added Fig.6, showing backscattering coefficients for 2-3 and 3-4 April.

*The authors argue, it has to do with the chemical composition of the dust particles, and then with the imaginary part? But my question is continuously: If we use an alternative shape model what would then be the result? Gasteiger et al., and modelling groups in Finland introduced very different shape models. And found very different results in terms of dust optical properties.*

In Fig.5a we observe that lidar ratio at 532 nm decreases with height, while high depolarization ratio doesn't change noticeably. From this we conclude that we deal with "pure" dust, but properties of this dust change with height. It can be particle size, shape, composition (and so imaginary part). At current stage we are not able to specify the mechanism. At a moment we have no rigid model that can be used for simulation of highly variable real dust particles. The only model available today (allowing to perform computations for reasonable time) is spheroids model, other models are not capable to treat the particles with radii as big as  $\sim 10 \mu\text{m}$ . And actually, spheroids work not so bad, as we can conclude, for example, from recent publication (Shin et al., ACP 18, 2018). However, if we talk about influence of the imaginary part, increase of  $\text{Im}$  will lead to decrease of backscattering for particles of any shape and lidar ratio should increase.

*And if we ignore all the giant dust particles in the complex data analysis, how large can be the damage?*

In observations of extinction and backscattering, we don't make assumptions about particles size or shape. However we don't have enough information, to conclude how presence the giant particles will influence further analysis (for example volume retrieval). But influence of spectral dependence of the imaginary part for giant particles should be stronger.

*P7 l 210-220: The lidar ratios for dust (355 vs 532 nm) are so different (60-70sr vs 45-60sr), although the depolarization ratio shows (almost) pure dust conditions, this is a very surprising result and in contradiction with the literature (Teschke et al, 2011, Gross et al., 2011). Any explanation for this? Maybe: : : it has to do again with missing coarse and giant, irregularly shaped dust particles? Because  $AE(S) = -AE(\text{bsc})$ , why is backscatter Angstroem exponent so pronounced, why is that so negative? Is everything ok with the backscatter retrieval (calibration in the reference height)?*

Our explanation is spectral dependence of the imaginary part. Increase of  $\text{Im}$  at 355 nm today is well proved by dust sample analysis. Typical increase of  $\text{Im}$  of dust is about 0.002 – 0.003, when wavelength decreases from 532 to 355 nm, and modeled ratio  $S_{355}/S_{532}$  agrees with observations. The increase of lidar ratio at 355 should be for any particle shape.

*explanation would be: smoke is responsible for the strong lidar ratio wavelength dependence, but then the depolarization ratio should indicate that.*

This is what we try to show in manuscript: the smoke presence can't explain such behavior. But increase of imaginary part – can.

*P9 L266-267: There are also smoke lidar ratios from the SAMUM Cabo Verde campaign (Teschke, Tellus, 2011, second paper).*

Added

*P11 L325-326: The lidar ratio depends on complex refractive index and size distribution, BUT ALSO ON SHAPE of the particles.*

Definitely!

*Again the conclusion from my side: Are all the simulations and retrieval products trustworthy and reflect the reality when a spheroidal shape model is needed and used? Can we trust the main findings and conclusions?*

Comparison of spheroids model with observations demonstrate that it reasonably reproduces observed lidar ratios, for example (Shin et al., ACP 18, 2018). So we think that findings presented are trustable. But definitely, spheroids model is not the ultimate solution and the models, accounting for particles with sharp faces should be considered.

*And again: What about the impact of missing giant, irregularly shaped particles? They are there over-near source regions!*

We have not enough information about properties and content of such particles for conclusions. But presence of giant particles will probably make influence of spectral dependence of  $Im$  even stronger.

*P11 L355-356: observed low values of  $AE(bsc)$  cannot be produced without accounting for a spectral dependence of the imaginary part. Yes, for the case of the assumed spheroidal shape model and size distribution up to about  $10_{\mu m}$  radius. AERONET is used for comparison. But here (photometer) also a spheroidal shape model is needed for dust particles. So, no independence between lidar and photometer products.*

In the case of AERONET the particle shape is not so critical, because wide range of angles is considered. And again, observed lidar parameters agree reasonably with AERONET results. So we think that AERONET is the most reliable source of information at a moment. Just want to mention, that AERONET was criticized for long time for too low values of imaginary part in UV. But recent sample measurements (Di Biagio et al., 2019) demonstrate that previously used values of imaginary part (and real as well) of dust at 355 nm were strongly overestimated and actually AERONET provides reasonable values.

*P12 L368-369: the authors write: :again the observed  $S355/S532$  ratio and  $AE(bsc)$  can be explained by the spectral dependence of the imaginary part of CRI. My answer again: Yes, for spheroidal particles. So again the reader is left with the question, and what is now the true impact of the imaginary part for irregularly shaped particles for which we do not have a model?*

As mentioned, increase of the imaginary part will always lead to decrease of backscattering (radiation is absorbed in particle) and to increase of lidar ratio. But the absolute values of lidar ratios, will definitely depend on particle shape (this is why we use spheroids instead spheres). We add corresponding phrase in Conclusion of revised manuscript.

*P12 L371:  $S355/S532$  is 1.5 !!! and the depol ratio  $>0.3$  indicates pure dust! Such a result I have never seen in the literature, and thus must have to do with the field site (and probably to the omnipresence of very large dust particles). I have no other explanation. Disregarding, whether my comment makes sense or not, the findings in this paper seem to be specific for Senegal, or maybe regions in the vicinity of dust source regions. That should be clearly written.*

Yes, such high  $S355/S532$  were observed only during strong dust episodes. Moreover, in many cases we observed “traditional” lidar ratios. Actually the goal of this manuscript was to show, that ratio  $S355/S532 >1$ , when imaginary part in UV (provided by AERONET) is high, and  $S355/S532 =1$  when  $Im$  is low. We observe good correlation between AERONET and lidar data. These instruments use different principles and are independent. So there should be some true behind our findings!

*P13 L418: The authors write: The relative humidity varied from episode to episode. : : . To my knowledge, different RH conditions usually show different air masses and different aerosol properties from different sources. At least it seems to be a difficult task to correlate RH with found aerosol properties, and to draw trustworthy conclusions on the hygroscopic (water uptake) properties.*

*P14, L447-448 Ok, this is said now but that comes very late.*

In revised manuscript we put it earlier.

*P14 : When modelling lidar ratios for smoke, do you have proper smoke particle size distributions as input?*

We used particle parameters from GEOS-5 model. Smoke parameters in different regions are too variable to be described by just one model. In our study we tried to compare model and our observations, to see if the model reproduces reasonably the lidar observed parameters.

*P15 L476-478: Also the size distribution changes a bit when the relative humidity increases. Is that considered in the simulations?*

Yes, PSD changed with RH in modeling.

*P17 after L545-550: At, at the end of the summary and conclusion section, one could mentioned as an outlook, that such studies as presented here should be repeated at many different places around the world, e.g. in the Middle East, Central and East Asia, Australia, and North Amerika in order to improve our knowledge on real-world aerosol optical properties needed in optical modelling and climate relevant atmospheric modelling.*

Yes, we absolutely agree. Corresponding comment is added to conclusion.

*My final summarizing comment: Disregarding the criticisms made here, my overall impression is: The discussion and sensitivity studies are nice and very helpful to interpret sophisticated multiple wavelength polarization Raman or HSRL lidar observations of complex dust and dust-smoke mixtures. The authors are experts and contribute with an important contribution to the field of dust atmospheric studies and interpretation in terms of dust size distribution, shape properties, and chemical composition. However, the discussion should be more sensitive to all the shortcomings (unknown shape, ignored giant particles). The more clearly the short comings are presented the more exciting the story and the probability to trigger further studies. The field is interesting, and the more questions are left at the end, the more interesting is this research field for the next generation of researches. To define the right questions is often better then to present some (questionable) answers: : :*

We agree with reviewer that dust is a complicated object and our study tries to figure out the main factors (for example spectral dependence of  $I_m$ ), influencing the observed values. But definitely more studies in this field are needed.

## **Figures:**

*Fig.1: Please skip the symbols, just show different colored thin lines. It is hard to see anything, except the ups and downs in the curves.*

The AERONET data points are scattered, so it is not good to use lines. In revised figure we decreased the symbol size. Now it should be better.

*Fig. 5a: The lidar ratios of 70 sr at 355 nm and 50 sr at 532 nm clearly shows the strong impact of smoke to my opinion. The extinction profiles and the depolarization ratio  $> 0.3$  indicate pure dust! I am very much confused.*

The depolarization is too high for smoke. The goal of this manuscript is to show, that such high lidar ratios are explained by increase of the imaginary part.

*Fig.5b: The same here. And the modelling results are at all even more extreme and thus totally unrealistic to my opinion. with the spheroidal model as Input almost 40 sr at 532 nm and 70 sr at 355 nm for pure dust conditions! Has this*

*something to do with any dust reality? And  $AE(S)$  of 1.2 or and  $AE(Bsc)$  of -1.2 from the model?*

The model GEOS-5 uses  $Im=0.007$  at 355 nm, which is quite reasonable (though near the up boarder). Computations are done for randomly oriented ellipsoids (results are very close to spheroids). The lidar ratio  $S_{355}=70$  sr predicted by the model was observed in our measurements during strong dust episodes. And when we have mixture of smoke and dust, the  $AE(ext)$  will be positive while  $AE(back)$  can be negative.

*Fig 6: Here one could discuss  $AE(S)=AE(ext)-AE(bsc)$  when showing  $AE(ext)$  and  $AE(bsc)$ .  $AE(ext)$  at least shows what we know from AERONET and the many dust lidar observations. But the backscatter wavelength dependence remains unique and seems to be quite special for this part of the world, whatever the reason may be.*

We agree the observations at different locations are needed.

*Fig. 8: Again, nicely measured 355 and 532 nm extinction profiles (a), and (surprisingly) 'well-known' lidar ratios in the upper part of the dust layer, and very trustworthy depol ratios (b) and trustworthy  $AE(ext)$  profile (b), and even  $AE(bsc)$  and thus  $AE(S)$  in the upper part of the layer, the same for (c) and (d). This is what we know from the literature and all the SAMUM and SALTRACE findings for Saharan dust and aged outflow dust transported to the west.*

This is the message of the manuscript! We can observe "traditional" lidar ratios and enhanced ones. And it correlates with enhanced imaginary part provided by AERONET. This is why we think that enhanced absorption is the reason.

*And then again this huge contrast: AGAIN these strange model results. Lidar ratios up to almost 70sr at 355 nm and down to 40sr at 532 nm, and at the same time, these very reasonable lidar measurements. The authors seem to provide me (voluntary) with the wappons I need to blame the modelling effort and point on the used shape model as the main source for these errors. What shall we believe at the end, from all the conclusions the author derive, when we see this? Fig.8 is an excellent figure to corroborate my opinion: I do not believe in any of the result!*

The model results are not strange at all. As soon as we consider spectral dependence of the imaginary part we will have enhanced values  $S_{355}$  for any particle shape. But exact values of lidar ratios will definitely depend on the particle shape. But from comparison of model and observations we conclude that model works actually not so bad.

*Fig 10: The depolarization ratio shows no change in the dust conditions over the plotted one month period and is so high (PURE DUST), but the lidar ratio is sensitively changing: and again probably solely dependent on the backscatter coefficient which is a strong function of refractive index and particle shape! So, what to do? Ok there is a correlation with the refractive index from AERONET. But AERONET also assumes a spheroidal model to produce dust-related results. So, what can we believe at the end.*

Yes, this is what we wanted to show. That depolarization is quite stable, but ratio  $S_{355}/S_{532}$  varies. Because backscattering is very sensitive to change of the imaginary part. The real part can also influence the variations, but, being spectrally independent, it should influence both  $S_{532}$  and  $S_{355}$ . Besides, AERONET does not report significant variation of the real part. Particle shape variation can definitely influence the lidar ratio. But then we would expect variation of depolarization ratio also, which does not happen. And finally, we see correlation of  $S_{355}/S_{532}$  changes with  $Im$  provided by AERONET. The instruments are independent, so it can not be just coincidence.

*Fig 12: Similar curves , good! But what does it help?*

Yes, it shows correlation between lidar and AERONET very clear.

*Fig 13: Size distribution from AERONET and from lidar (at what height?).*

Within 2-3 km range. This is in the text and we added this value to the figure capture.

*Differences are visible but both size distributions stop at 10 microns. What about bigger particles when measuring very close to the source region: Is it possible that the used size distribution in all model runs underestimate the impact of the giant particles?*

We don't have enough information about giant particles content to estimate their influence. But the influence of the imaginary part probably will be even higher.

Fig. 14: I do not believe the Imag curve (stars) as long as we have another errors source (the spheroidal shape model).  $AE(Bsc) = - AE(S)$  can be used here in the discussion because  $AE(ext)$  is almost zero.

Drop of  $AE(bsc)$  with  $Im$  increase will be for any particle shape. Comparison the values of lidar ratios with predictions of spheroids model shows actually this model works not so bad (Shin et al., ACP 18, 2018).

*Fig 17-Fig 19: The RH study and discussion makes the paper quite long, and all the efforts are again quite speculative: : : Fig 19 is not convincing.*

We agree that in Fig.19 there are too many assumptions. Figure is removed from revised manuscript. But the rest of results we would prefer to keep, because these demonstrate the properties of dust – smoke mixtures for different RH.
